# Supplementary material
Source: PubMed Central journal article supplement (PMC9904390)
Supplement: NIHMS1860928-supplement-2.pdf [file NIHMS1860928-supplement-2.pdf]

**A** T<sub>RM</sub> cell absolute numbers

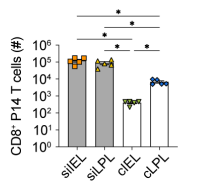

**B**

GzmA

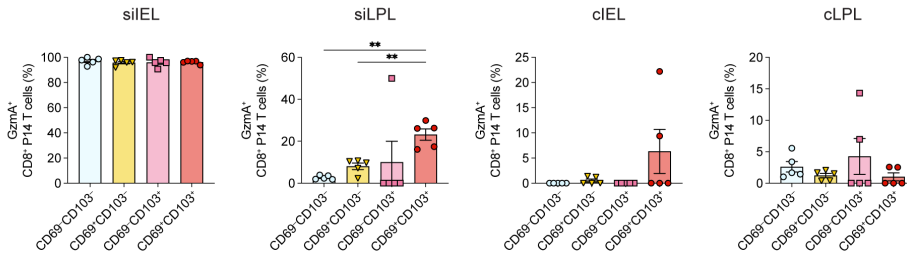

**C**

GzmB

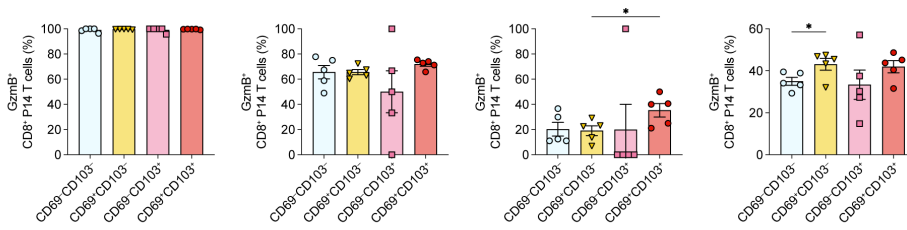

**D**

TNF

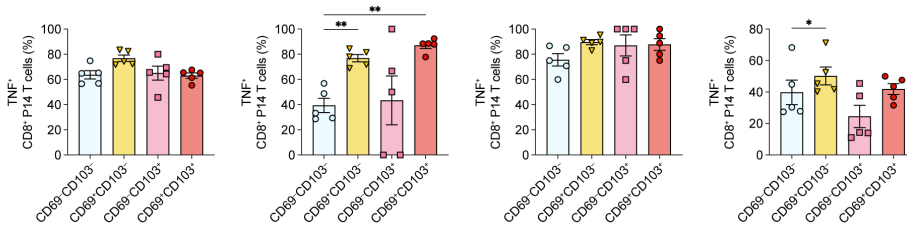

**E**

IFN $\gamma$

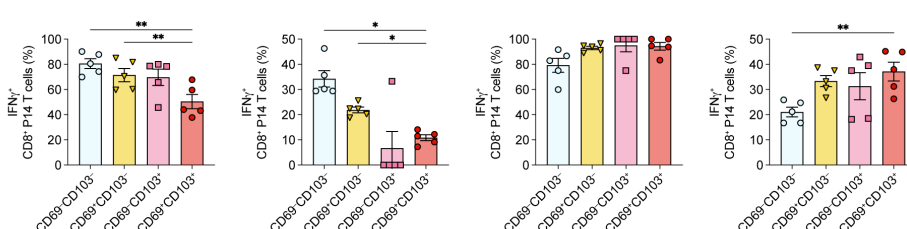

**F**

IL-2

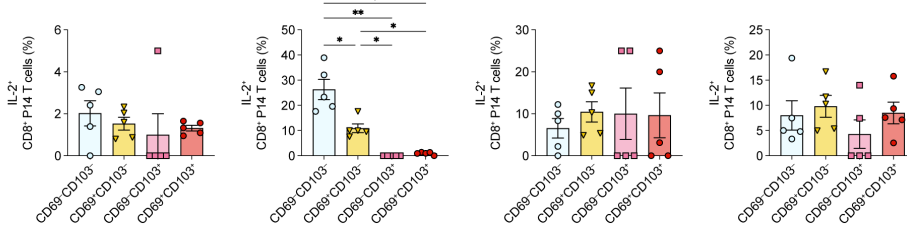

**G**

CD127

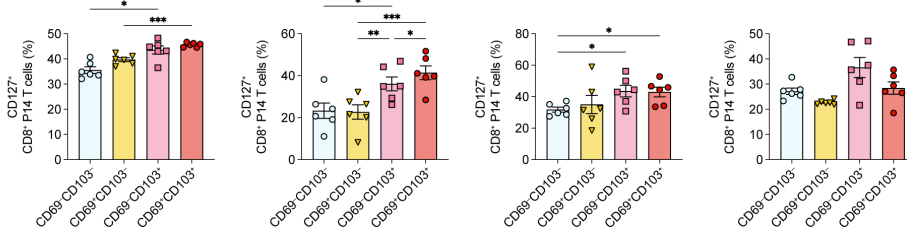

**Figure S1. Phenotypic and functional characteristics of CD69<sup>-</sup>CD103<sup>-</sup>, CD69<sup>+</sup>CD103<sup>-</sup>, CD69<sup>-</sup>CD103<sup>+</sup>, and CD69<sup>+</sup>CD103<sup>+</sup> intestinal CD8<sup>+</sup> T<sub>RM</sub> cells, Related to Figures 1 and 2.**

**(A)** Absolute numbers of gated i.v.-negative CD45.1<sup>+</sup>CD8β<sup>+</sup> P14 T cells in each intestinal tissue compartment.

**(B–G)** Bar graphs representing frequencies of CD69<sup>-</sup>CD103<sup>-</sup> (light blue circles), CD69<sup>+</sup>CD103<sup>-</sup> (yellow inverted triangles), CD69<sup>-</sup>CD103<sup>+</sup> (pink squares), or CD69<sup>+</sup>CD103<sup>+</sup> (red circles) cells expressing GzmA **(B)**, GzmB **(C)**, TNF **(D)**, IFNγ **(E)**, IL-2 **(F)**, and CD127 **(G)** in gated i.v.-negative CD45.1<sup>+</sup>CD8β<sup>+</sup> P14 T cells from the siIEL, siLPL, cIEL, and cLPL intestinal tissue compartments. For analyses of TNF, IFNγ, and IL-2, cells were restimulated *in vitro* for 3h with gp33-41 peptide.

Data are represented as mean ± SEM. Repeated measures one-way ANOVA. \*p<0.05, \*\*p<0.01, \*\*\*p<0.001 \*\*\*\*p<0.0001. Data are representative of at least 3 independent experiments with n=5-6 mice per experiment.

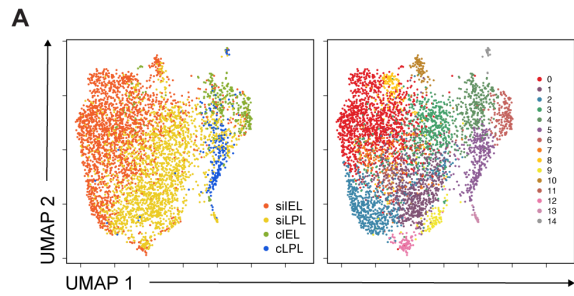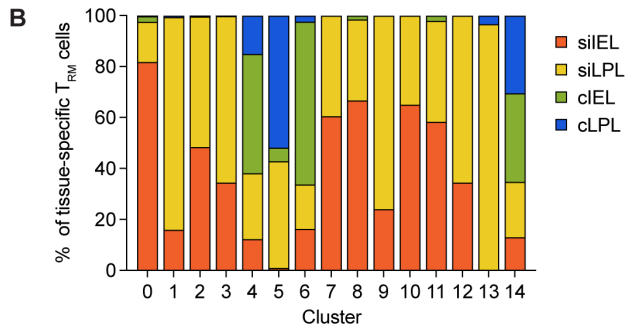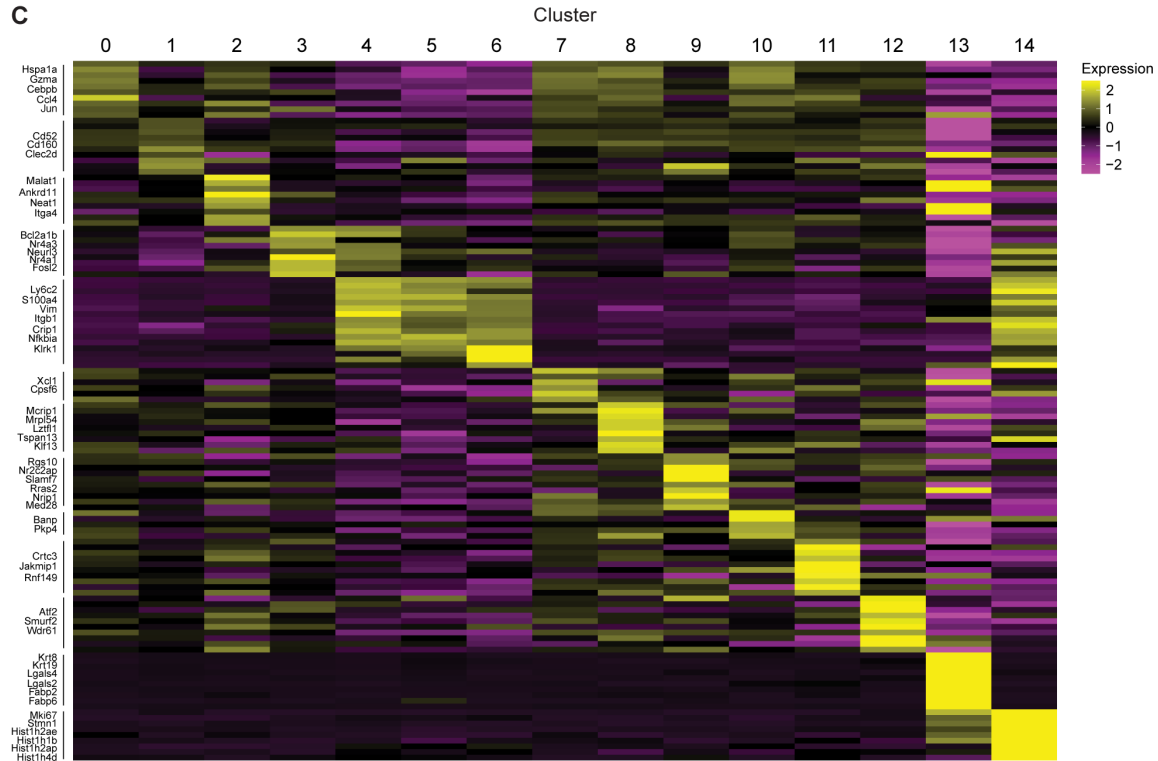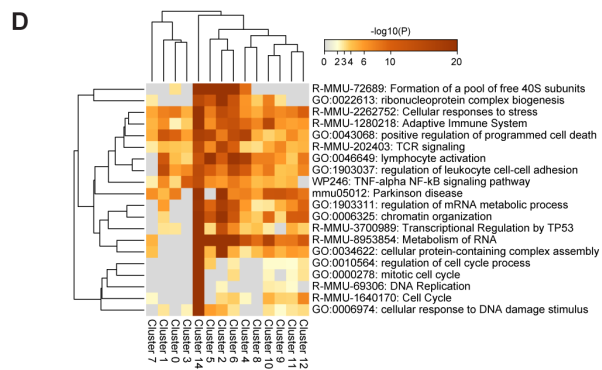

**Figure S2. Transcriptional heterogeneity exhibited by CD8<sup>+</sup> T<sub>RM</sub> cells from small intestine and colon, Related to Figure 3.** CD8<sup>+</sup> P14 T cells harvested from siIEL, siLPL, cIEL, and cLPL tissue compartments were FACS-purified more than 21 days after LCMV infection and processed for CITE-seq with the 10x Genomics platform.

**(A)** UMAP clustering of all CD8 $\beta$ <sup>+</sup> P14 T<sub>RM</sub> cells from each intestinal tissue compartment, colored by tissue compartment identity (left) or cluster identity (right).

**(B)** Bar graph representing the composition of each cell cluster based on intestinal tissue compartment.

**(C)** Top ten genes differentially expressed by each UMAP cluster, represented as a hierarchically clustered summary heatmap; rows represent individual genes and columns represent each UMAP cluster. Selected genes are highlighted on the left.

**(D)** Comparative gene ontology analyses performed on all UMAP clusters, represented as a summary heatmap.

**A**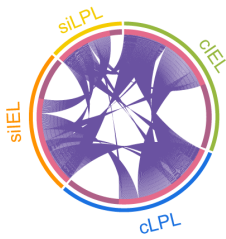**B**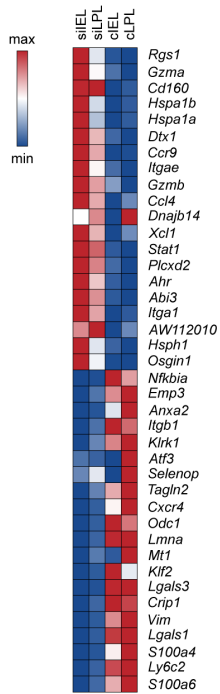**C**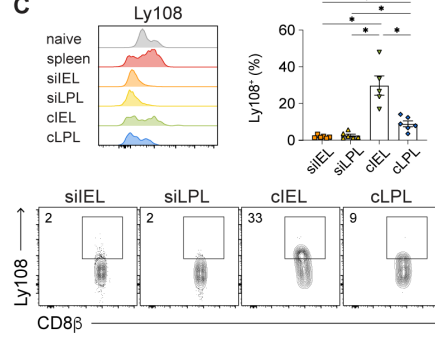**D**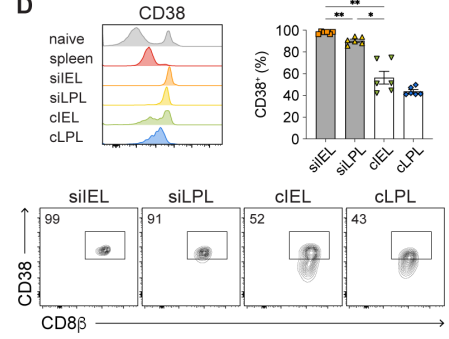**E**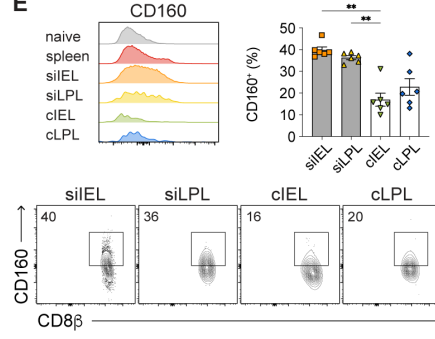**F**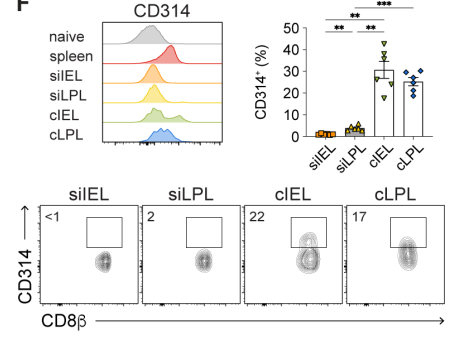**G**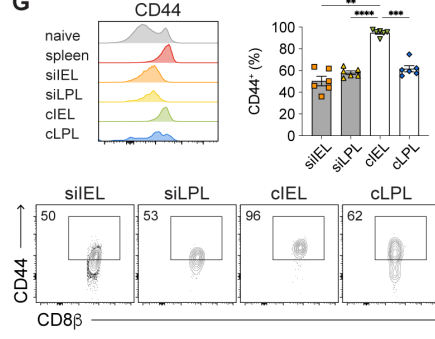**H**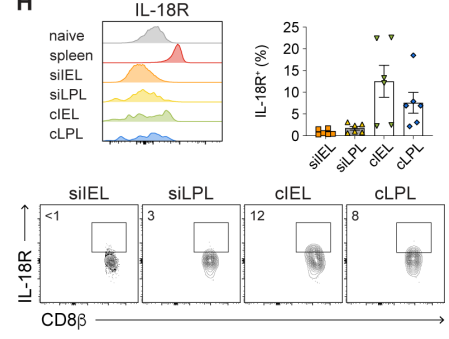

**Figure S3. Heterogeneity at the mRNA and protein levels exhibited by CD8<sup>+</sup> T<sub>RM</sub> cells from small intestine and colon, Related to Figure 3.**

**(A)** Differentially expressed genes shared among CD8<sup>β</sup><sup>+</sup> P14 T<sub>RM</sub> cells from the siIEL, siLPL, cIEL, and cLPL intestinal tissue compartments, represented as a Circos plot. Inner circle represents gene lists, and purple curves link identical (shared) genes; outer circle represents tissue compartment identity.

**(B)** Top twenty genes differentially expressed between small intestine vs. colon CD8<sup>+</sup> T<sub>RM</sub> cells, represented as a hierarchically clustered summary heatmap; rows represent individual genes and columns represent each of the 4 intestinal tissue compartments.

**(C–H)** Representative flow cytometry plots (bottom) showing expression of Ly108 **(C)**, CD38 **(D)**, CD160 **(E)**, CD314 **(F)**, CD44 **(G)**, and IL-18R **(H)** by gated i.v.-negative CD45.1<sup>+</sup>CD8<sup>β</sup><sup>+</sup> P14 T cells from the four intestinal tissue compartments; numbers represent the frequencies of cells within each gate. Bar graphs (top right) indicate the frequencies of P14 T cells expressing each molecule. Histograms (top left) indicate the distribution of expression of each marker by P14 T cells from each of the four intestinal tissue compartments and the spleen; expression by naïve (CD62L<sup>hi</sup>CD44<sup>lo</sup>) CD8<sup>β</sup><sup>+</sup> T cells from a separate uninfected mouse is shown for comparison.

Data are represented as mean ± SEM. Repeated measures one-way ANOVA. \*p<0.05, \*\*p<0.01, \*\*\*p<0.001 \*\*\*\*p<0.0001. Data are representative of at least 3 independent experiments with n=5-6 mice per experiment.

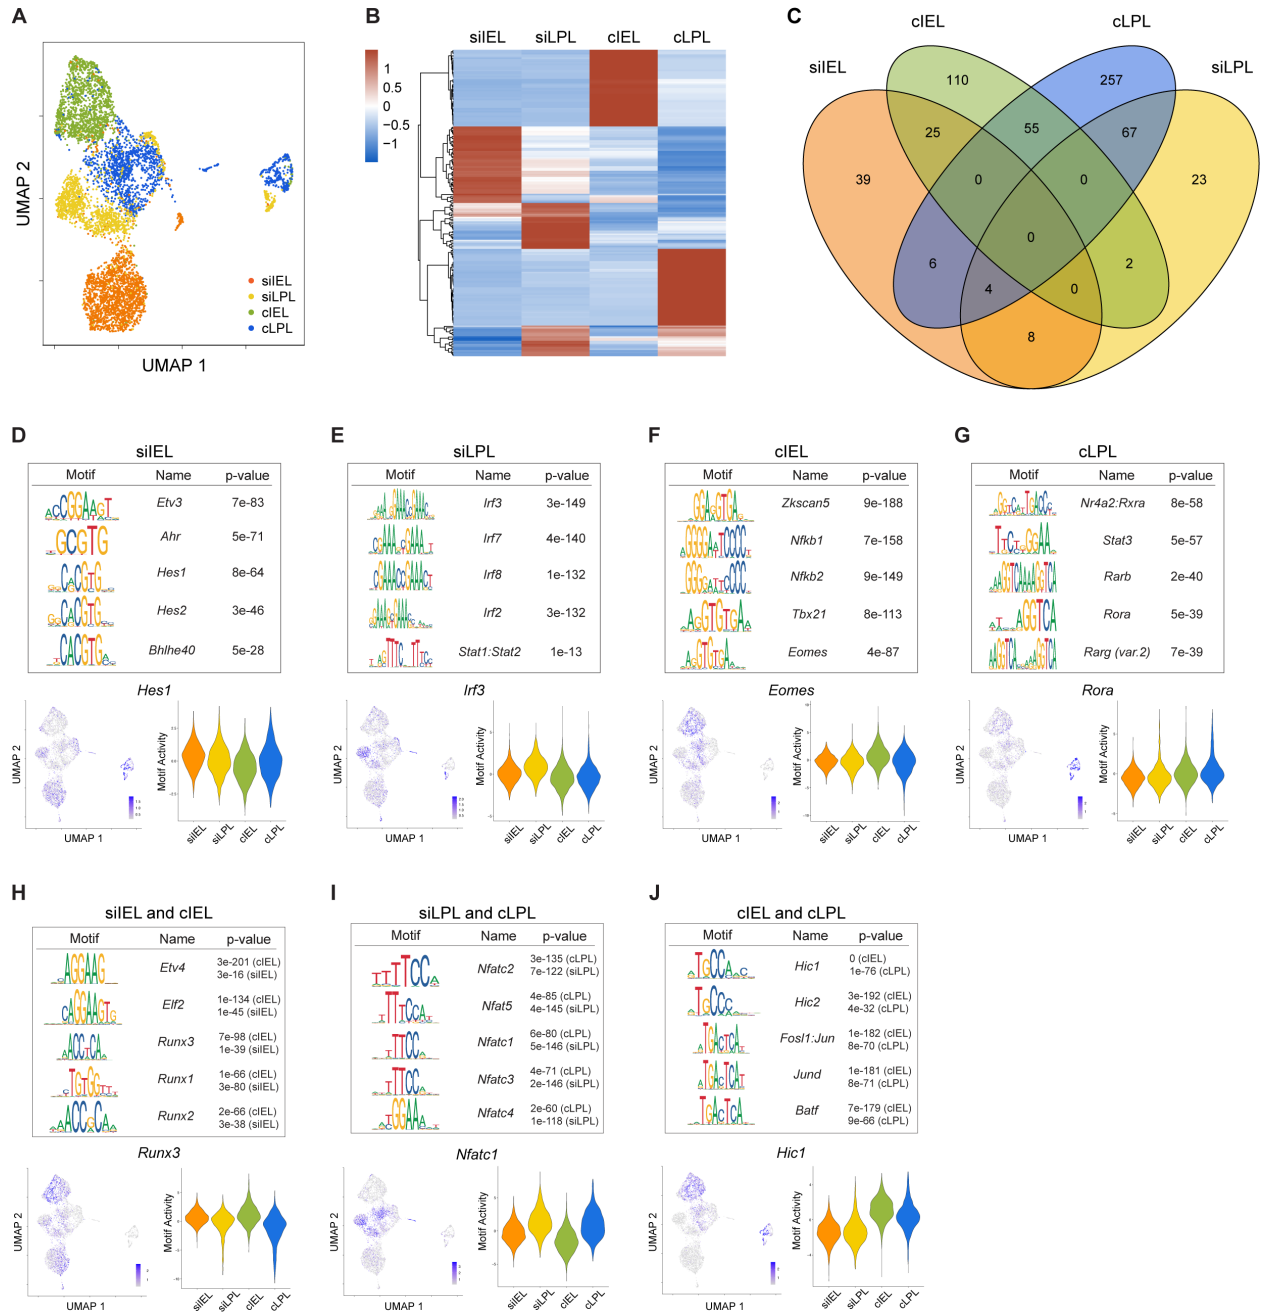

**Figure S4. Epigenetic heterogeneity exhibited by CD8<sup>+</sup> T<sub>RM</sub> cells from small intestine and colon, Related to Figure 3.**

**(A)** UMAP clustering analyses of scATAC-seq data from CD8<sup>+</sup> P14 T<sub>RM</sub> cells from the siIEL, siLPL, cIEL, and cLPL intestinal tissue compartments.

**(B)** Top differentially accessible chromatin regions, represented as a hierarchically clustered summary heatmap; rows represent regions and columns represent each of the 4 intestinal tissue compartments.

**(C)** Venn diagram analysis of preferentially enriched and shared transcription factor motifs identified in accessible chromatin regions from each of the 4 intestinal tissue compartments.

**(D–J)** Examples of transcription factor motifs (top) preferentially enriched (**D–G**) or shared (**H–J**) in accessible chromatin regions from each of the 4 intestinal tissue compartments. Motif activity for selected genes is represented as violin plots (middle) or superimposed onto UMAP embeddings (bottom).



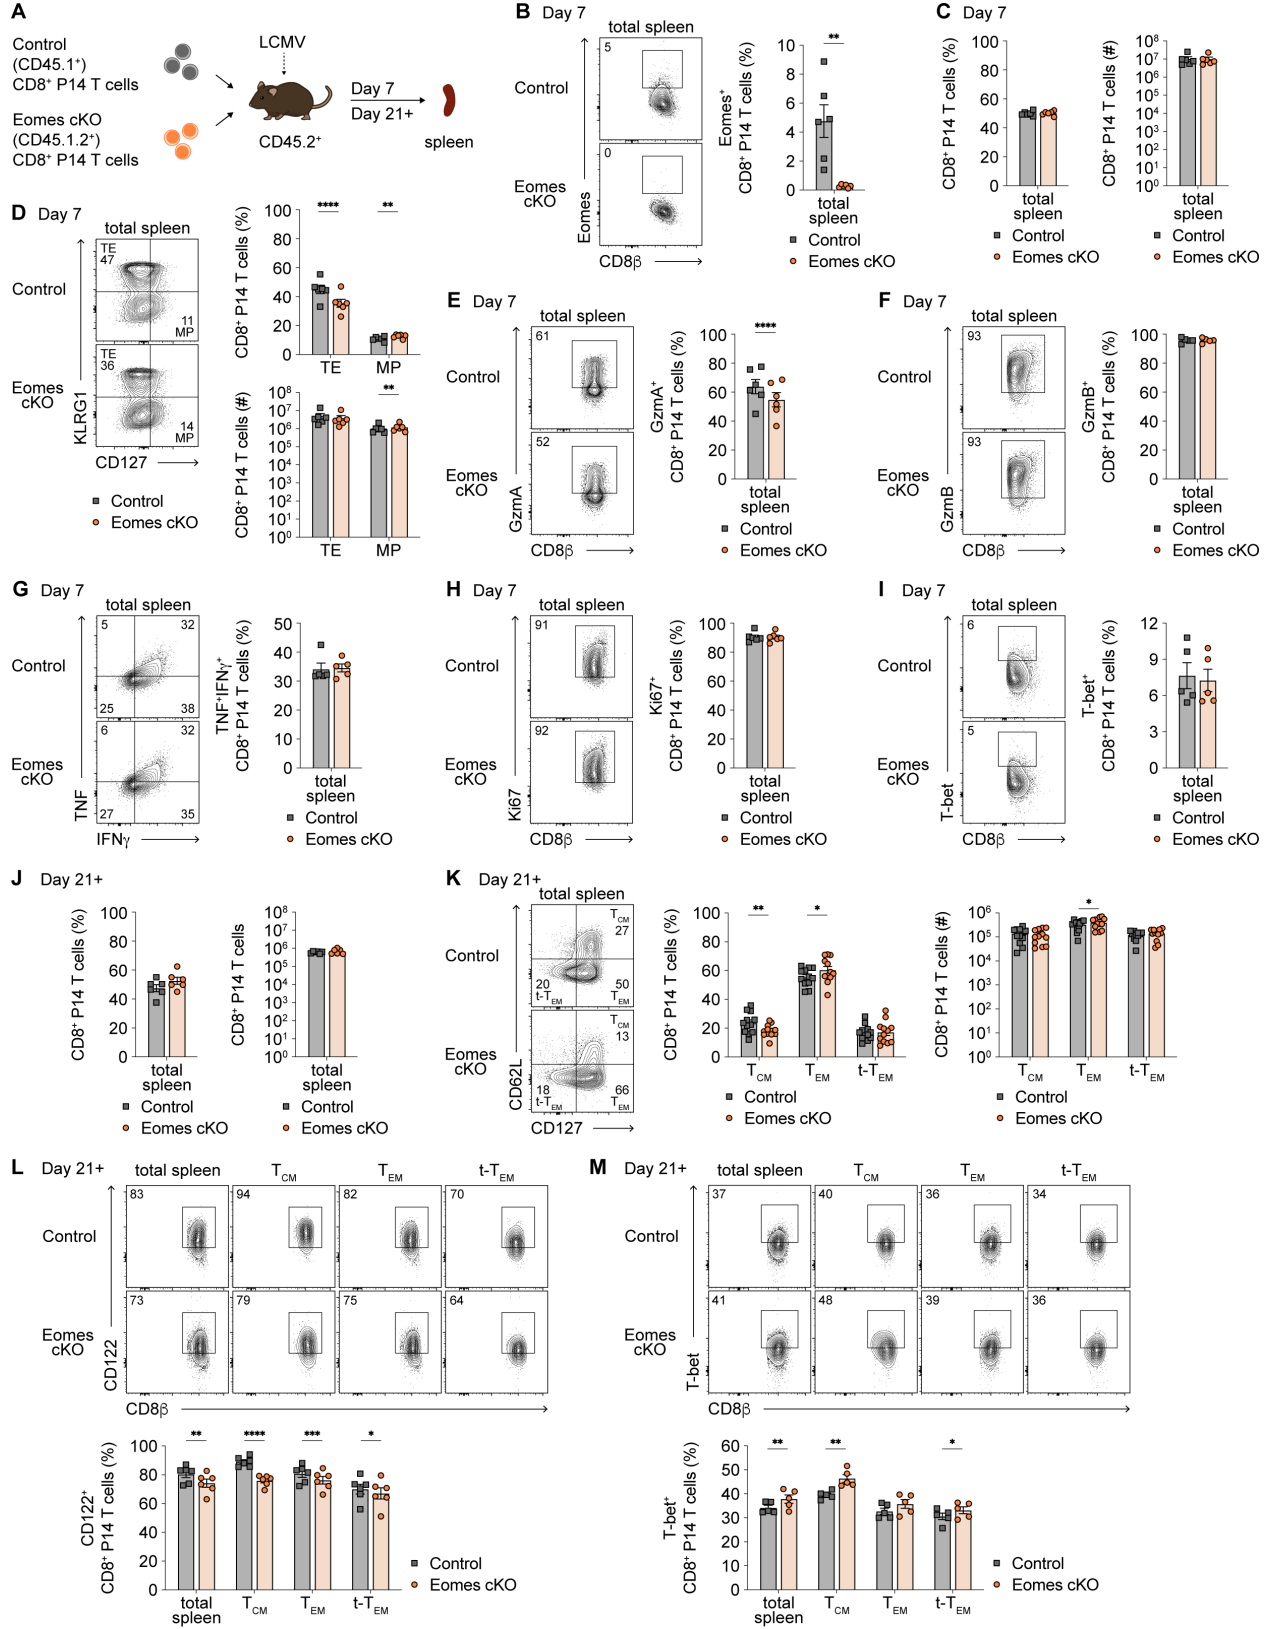

**Figure S5. Deficiency of Eomes has modest effects on effector CD8<sup>+</sup> T cell differentiation in the spleen, Related to Figure 5.**

**(A)** Experimental design. CD8<sup>+</sup> P14 T cells from control (CD45.1<sup>+</sup>) and *Eomes*<sup>fl/fl</sup>*Cd4-Cre*<sup>+</sup>(CD45.1.2<sup>+</sup>, Eomes cKO) mice were mixed at a 1:1 ratio and adoptively co-transferred into congenic CD45.2<sup>+</sup> recipients prior to infection with LCMV. P14 T cells were isolated from spleen at 7 days (**B–I**) or after 21 days (**J–M**) following infection.

**(B and E–I)** Representative flow cytometry plots (left) and bar graphs (right) displaying frequencies of control (grey squares) vs. Eomes cKO (orange circles) P14 T cells expressing Eomes (**B**), GzmA (**E**), GzmB (**F**), TNF and IFN $\gamma$  (**G**), Ki67 (**H**), or T-bet (**I**) at 7 days following infection; numbers represent the frequencies of cells within each gate. For analyses of TNF and IFN $\gamma$ , cells were restimulated *in vitro* for 3h with gp<sub>33-41</sub> peptide.

**(C and J)** Quantification of the proportions (left) or absolute numbers (right) of control vs. Eomes cKO P14 T cells in the spleen at 7 days (**C**) or after 21 days (**J**) following infection.

**(D)** Representative flow cytometry plots (left) displaying KLRG1 and CD127 expression by control vs. Eomes cKO P14 T cells in the spleen at 7 days following infection. Bar graphs representing proportions (top right) or absolute numbers (bottom right) of control vs. Eomes cKO P14 T cells in the spleen exhibiting a terminal effector ('TE', KLRG1<sup>hi</sup>CD127<sup>lo</sup>) or memory precursor ('MP', KLRG1<sup>lo</sup>CD127<sup>hi</sup>) phenotype.

**(K)** Representative flow cytometry plots (left) and bar graphs indicating the frequencies (middle) and absolute numbers (right) of control vs. Eomes cKO T<sub>CM</sub> (CD62L<sup>hi</sup>CD127<sup>hi</sup>), T<sub>EM</sub> (CD62L<sup>lo</sup>CD127<sup>hi</sup>), and t-T<sub>EM</sub> (CD62L<sup>lo</sup>CD127<sup>lo</sup>) cells after 21 days following infection.

**(L and M)** Representative flow cytometry plots (top) and bar graphs (bottom) displaying CD122 **(L)** and T-bet **(M)** expression by control vs. Eomes cKO T<sub>CM</sub> (CD62L<sup>hi</sup>CD127<sup>hi</sup>), T<sub>EM</sub> (CD62L<sup>lo</sup>CD127<sup>hi</sup>), and t-T<sub>EM</sub> (CD62L<sup>lo</sup>CD127<sup>lo</sup>) cells after 21 days following infection.

Data are represented as mean  $\pm$  SEM. Paired *t*-test. \**p*<0.05, \*\**p*<0.01, \*\*\**p*<0.001 \*\*\*\**p*<0.0001. Data are representative of at least 3 independent experiments with n=5-6 mice per experiment.

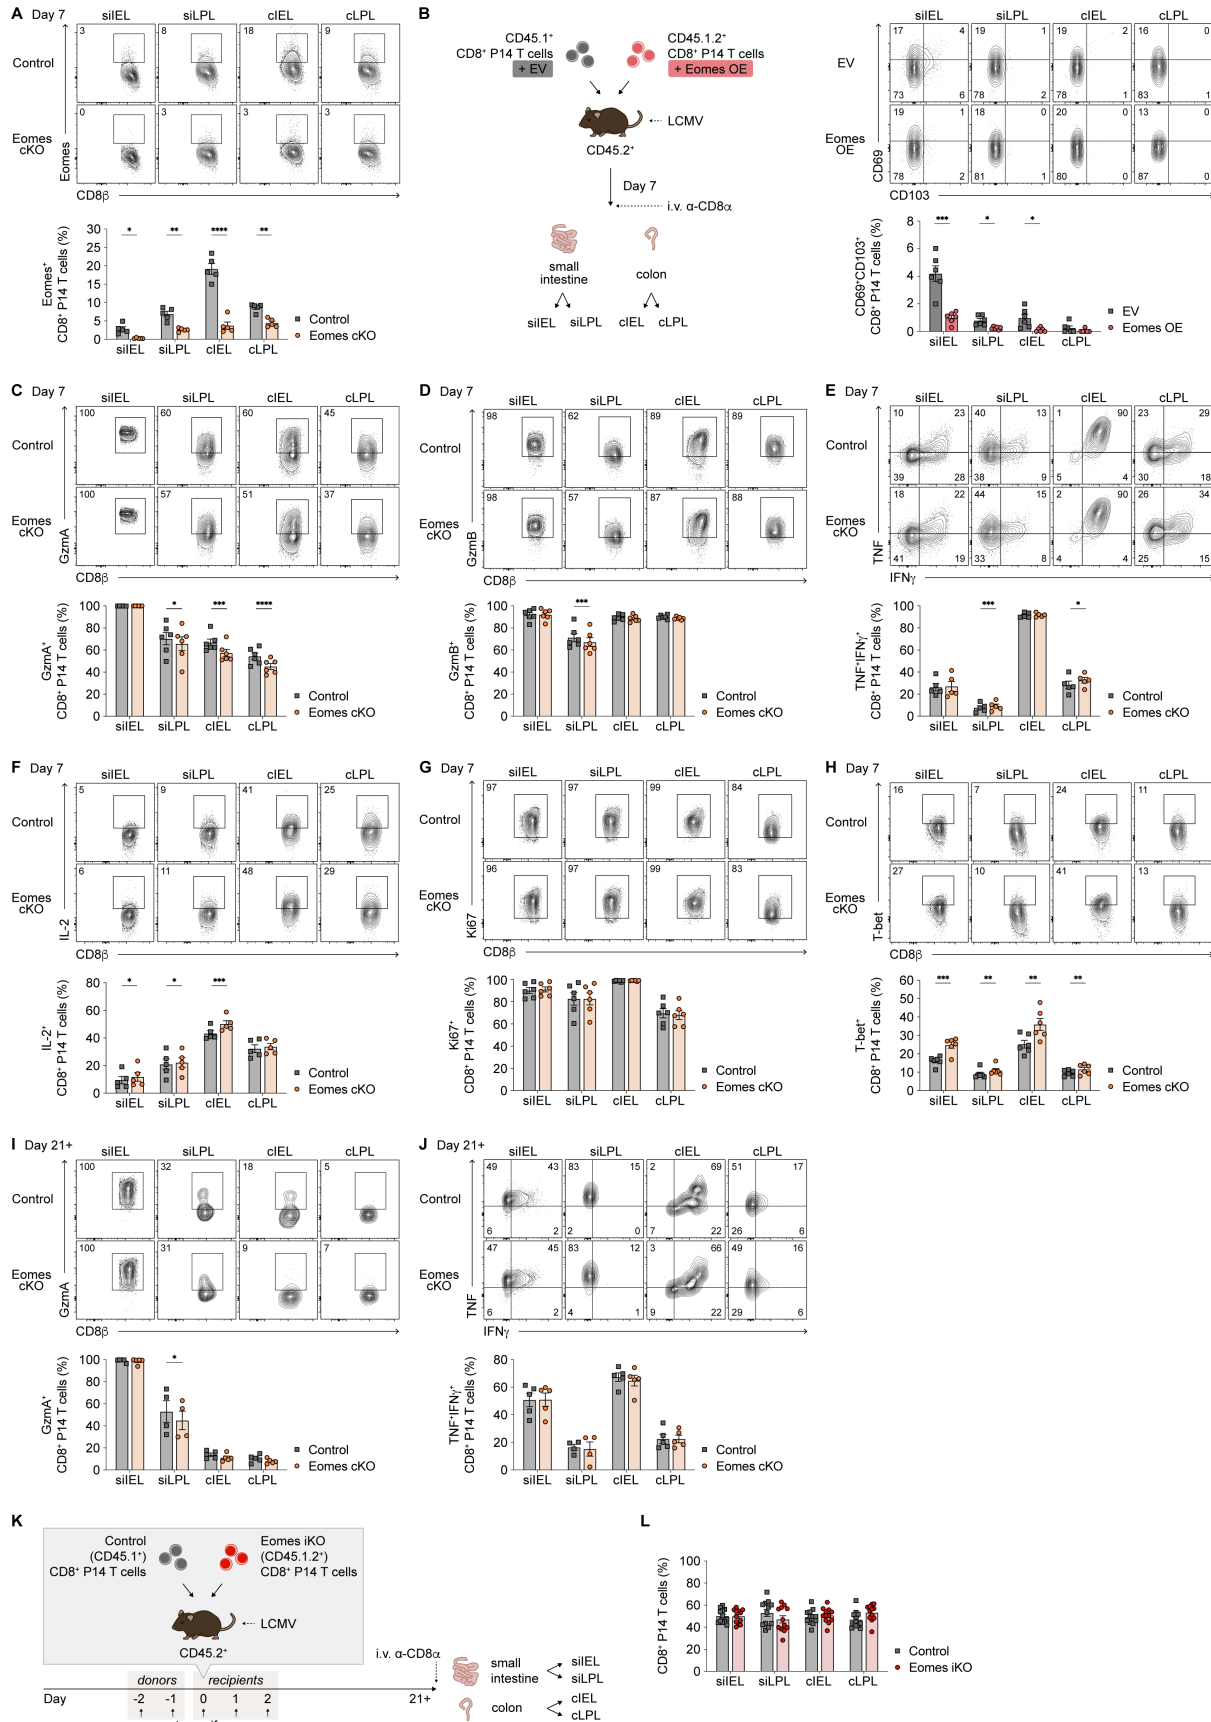

**Figure S6. Deficiency of Eomes has modest effects on intestinal CD8<sup>+</sup> T cell differentiation, Related to Figure 5.**

(A and C–H) CD8<sup>+</sup> T cells from control (CD45.1<sup>+</sup>) and *Eomes*<sup>fl/fl</sup>*Cd4-Cre*<sup>+</sup> (CD45.1.2<sup>+</sup>, Eomes cKO) P14 mice were mixed at a 1:1 ratio and adoptively co-transferred into congenic CD45.2<sup>+</sup> recipients prior to infection with LCMV; gated i.v.-negative siIEL, siLPL, cIEL, and cLPL CD8<sup>+</sup> T cells were analyzed at 7 days post-infection. Representative flow cytometry plots (top) and bar graphs displaying frequencies of control (grey squares) vs. Eomes cKO (orange circles) P14 T cells expressing Eomes (A), GzmA (C), GzmB (D), TNF and IFN $\gamma$  (E), IL-2 (F), Ki67 (G), or T-bet (H); numbers represent the frequencies of cells within each gate. For analyses of TNF, IFN $\gamma$ , and IL-2, cells were restimulated *in vitro* for 3h with gp<sub>33-41</sub> peptide. (B) CD8<sup>+</sup> T cells from wild-type CD45.1<sup>+</sup> P14 or wild-type CD45.1.2<sup>+</sup> P14 mice were activated and transduced with empty vector (EV) or Eomes overexpression (Eomes OE) constructs, respectively. Cells were mixed at a 1:1 ratio and adoptively co-transferred into congenic CD45.2<sup>+</sup> hosts that were subsequently infected with LCMV; gated i.v.-negative siIEL, siLPL, cIEL, and cLPL CD8<sup>+</sup> T cells were analyzed at 7 days post-infection. Representative flow cytometry plots (top) displaying CD69 and CD103 expression by EV vs. Eomes OE P14 T cells. Bar graph (bottom) representing frequencies of CD69<sup>+</sup>CD103<sup>+</sup> EV vs. Eomes OE P14 T cells. (I and J) Representative flow cytometry plots (top) and bar graphs (bottom) displaying GzmA (I) and TNF and IFN $\gamma$  (J) expression by control vs. Eomes cKO P14 T cells after 21 days following infection. For analyses of TNF and IFN $\gamma$ , cells were restimulated *in vitro* for 3h with gp<sub>33-41</sub> peptide. (K) Experimental design. Control (CD45.1<sup>+</sup>) and *Eomes*<sup>fl/fl</sup>*Ert2-Cre*<sup>+</sup> (CD45.1.2<sup>+</sup>, Eomes iKO) P14 donor mice were treated with tamoxifen i.p. for 2 days prior to sacrifice. CD8<sup>+</sup> T cells from control and Eomes iKO P14 donor mice were mixed at a 1:1 ratio and adoptively co-transferred into congenic CD45.2<sup>+</sup> recipients 30 minutes

prior to infection with LCMV. Intraperitoneal tamoxifen injections were continued on the day of infection and on days 1 and 2 post-infection; siIEL, siLPL, cIEL, and cLPL compartments were harvested and analyzed after day 21 post-infection.

**(L)** Quantification of the proportions of control (gray squares) vs. Eomes iKO (red circles) CD8<sup>+</sup> P14 cells in each intestinal tissue compartment.

Data are represented as mean  $\pm$  SEM. Paired *t*-test. \**p*<0.05, \*\**p*<0.01, \*\*\**p*<0.001 \*\*\*\**p*<0.0001. Data are representative of at least 3 independent experiments with n=5-6 mice per experiment.

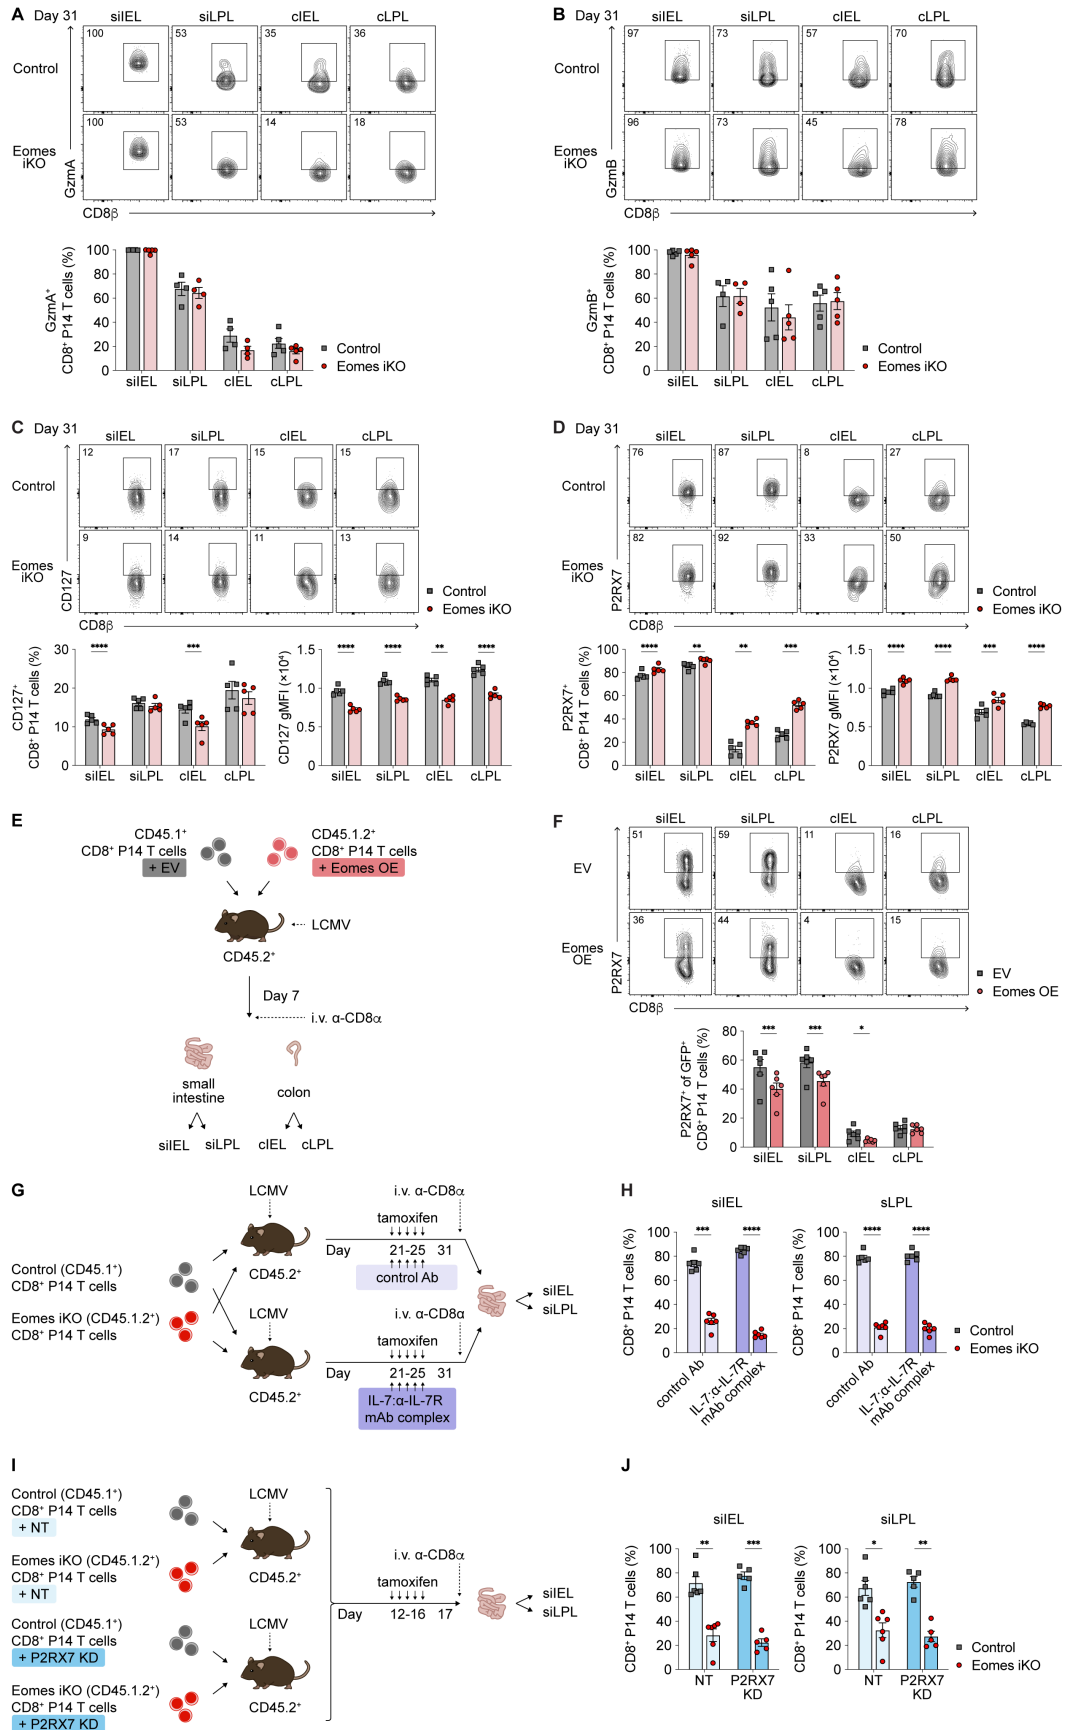

**Figure S7. Transcriptional analyses identify putative regulators of small intestine CD8<sup>+</sup> T<sub>RM</sub> cell maintenance, Related to Figures 6 and 7.**

**(A and B)** Representative flow cytometry plots (top) displaying GzmA **(A)** and GzmB **(B)** expression by gated i.v.-negative control vs. Eomes iKO P14 T cells in each intestinal tissue compartment at day 31 post-infection; numbers represent the frequencies of cells within each gate. Bar graphs (bottom) indicate the frequencies of control vs. Eomes iKO P14 T cells expressing each molecule. **(C and D)** Representative flow cytometry plots (top) displaying CD127 **(C)** and P2RX7 **(D)** expression by gated i.v.-negative control vs. Eomes iKO P14 T cells in each intestinal tissue compartment. Bar graphs indicate the frequencies of control vs. Eomes iKO P14 T cells expressing each molecule (bottom left) and the expression of each molecule on a per-cell basis (gMFI) (bottom right) at day 31 post-infection. **(E)** Experimental design. CD8<sup>+</sup> T cells from wild-type CD45.1<sup>+</sup> or wild-type CD45.1.2<sup>+</sup> P14 T cells were activated and transduced with empty vector (EV) or Eomes overexpression (Eomes OE) constructs, respectively. Cells were mixed at a 1:1 ratio and adoptively co-transferred into congenic CD45.2<sup>+</sup> hosts that were subsequently infected with LCMV. Small intestine IEL, siLPL, cIEL, and cLPL CD8<sup>+</sup> T cells were isolated at 7 days post-infection. **(F)** Representative flow cytometry plots (top) displaying P2RX7 expression by gated i.v.-negative EV vs. Eomes OE P14 T cells. Bar graph represents frequencies of cells expressing P2RX7. **(G)** Experimental design. CD8<sup>+</sup> T cells from control (CD45.1<sup>+</sup>) or *Eomes*<sup>fl/fl</sup>*Ert2-Cre*<sup>+</sup>(CD45.1.2<sup>+</sup>, Eomes iKO) P14 mice were adoptively co-transferred into congenic CD45.2<sup>+</sup> recipients prior to infection with LCMV. Mice received 5 doses of tamoxifen along with control mAb or IL-7- $\alpha$ IL-7R mAb complexes i.p. once daily starting at day 21 post-infection; siIEL and siLPL CD8<sup>+</sup> T cells were harvested 10 days later after day 31 post-infection.



**(H)** Bar graphs representing frequencies of control mAb-treated wild-type vs. control Ab-treated Eomes iKO P14 T cells (left, light purple bars); and frequencies of IL-7- $\alpha$ IL-7R mAb complex-treated wild-type vs. IL-7- $\alpha$ IL-7R mAb complex-treated Eomes iKO P14 T cells (right, dark purple bars) in the siIEL and siLPL tissue compartments. **(I)** Experimental design. CD8<sup>+</sup> T cells from control (CD45.1<sup>+</sup>) or Eomes iKO (CD45.1.2<sup>+</sup>) P14 mice were activated and transduced with non-targeting shRNA (NT) or shRNA targeting *P2rx7* (P2RX7 KD). Cells were mixed at a 1:1 ratio and adoptively co-transferred into congenic CD45.2<sup>+</sup> hosts that were subsequently infected with LCMV. Mice received 5 doses of tamoxifen i.p. once daily starting on day 12 post-infection; siIEL and siLPL CD8<sup>+</sup> T cells were harvested on day 17 post-infection. **(J)** Bar graphs representing frequencies of NT-transduced control vs. NT-transduced Eomes iKO P14 T cells (left, light blue bars); and frequencies of P2RX7 KD-transduced control vs. P2RX7 KD-transduced Eomes iKO P14 T cells (right, dark blue bars) in the siIEL and siLPL tissue compartments. Data are represented as mean  $\pm$  SEM. Paired *t*-test. \**p*<0.05, \*\**p*<0.01, \*\*\**p*<0.001 \*\*\*\**p*<0.0001. Data are representative of at least 3 independent experiments with n=5-6 mice per experiment.
